# Supplementary material for: Enhanced lithium storage capacity of Co3O4hexagonal nanorings derived from Co-based metal organic frameworks
Source: Royal Society of Chemistry journal article supplement (doi:10.1039/c4ta02874k), 2014-08-27
Supplement: c4ta02874k1.pdf [file c4ta02874k1.pdf]

## Supporting Information

### **Enhanced lithium storage capacity of Co<sub>3</sub>O<sub>4</sub> hexagonal nanorings derived from Co-based metal organic frameworks**

Panpan Su<sup>a,b</sup>, Shichao Liao<sup>b,c</sup>, Feng Rong<sup>a,b</sup>, Fuqing Wang<sup>b,c</sup>, Jian Chen<sup>c</sup>, Can Li<sup>a\*</sup>,  
Qihua Yang<sup>a\*</sup>

<sup>a</sup> State Key Laboratory of Catalysis, Dalian Institute of Chemical Physics, Chinese Academy of Sciences, 457 Zhongshan Road, Dalian 116023, China

<sup>b</sup> University of Chinese Academy of Sciences, Beijing 100039, China

<sup>c</sup> Laboratory of Advanced Rechargeable Batteries, Dalian Institute of Chemical Physics, Chinese Academy of Sciences, 457 Zhongshan Road, Dalian 116023, China

\* To whom correspondence should be addressed.

Email Address: [yangqh@dicp.ac.cn](mailto:yangqh@dicp.ac.cn); [canli@dicp.ac.cn](mailto:canli@dicp.ac.cn).

Tel: 86-411-84379552; 86-411-84379070.

Fax Number: 86-411-84694447.

URL: <http://www.hmm.dicp.ac.cn>; <http://www.canli.dicp.ac.cn>.

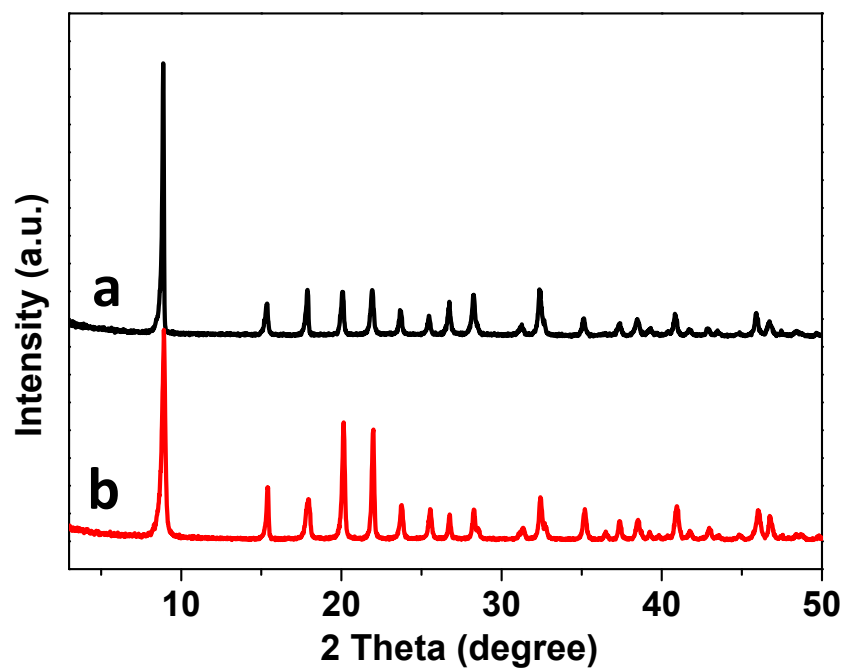

Fig. S1 XRD patterns of (a) Co-NTCDA microspindles and (b) Co-NTCDA microflowers.

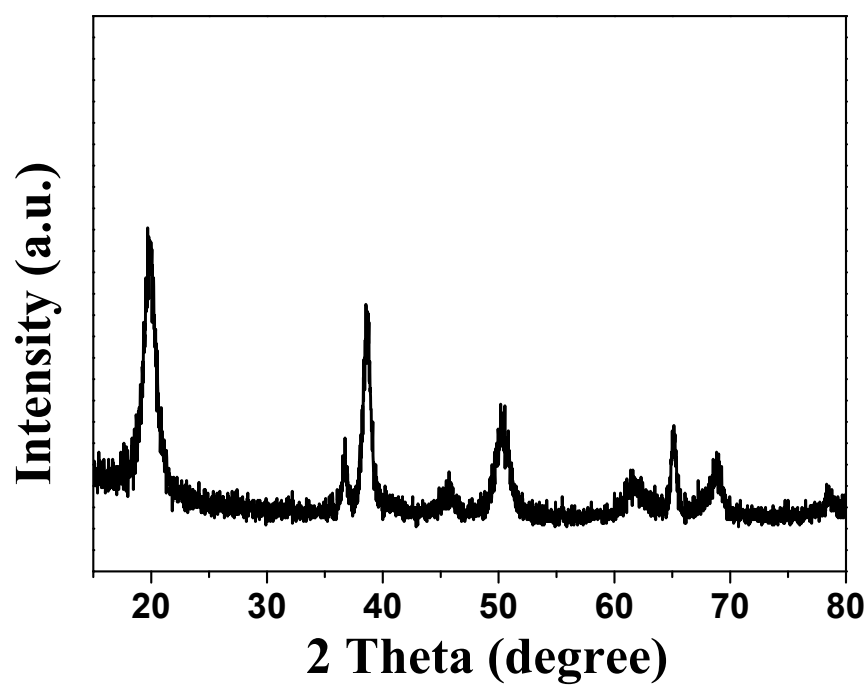

Fig. S2 XRD pattern of hydrolyzed products using Co-NTCDA microflowers in TMAOH system.

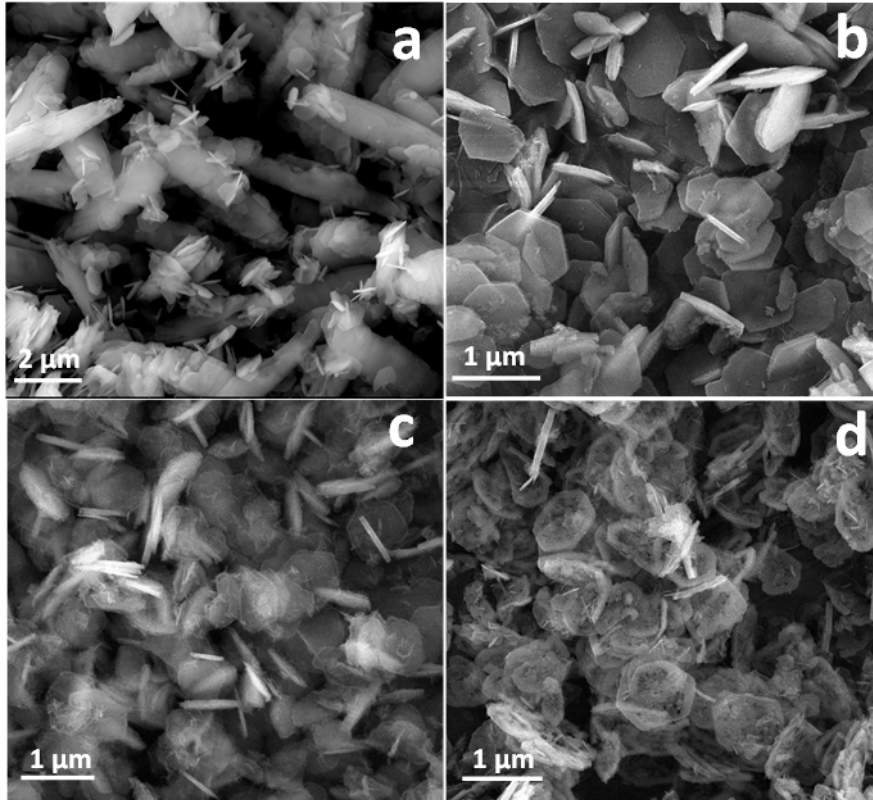

Fig. S3 SEM images of hydrolysis products of Co-NTCDA microspindles under TMAOH system at different hydrolysis intervals (a) 1h, (b) 2h, (c) 8h and (d) 56h.

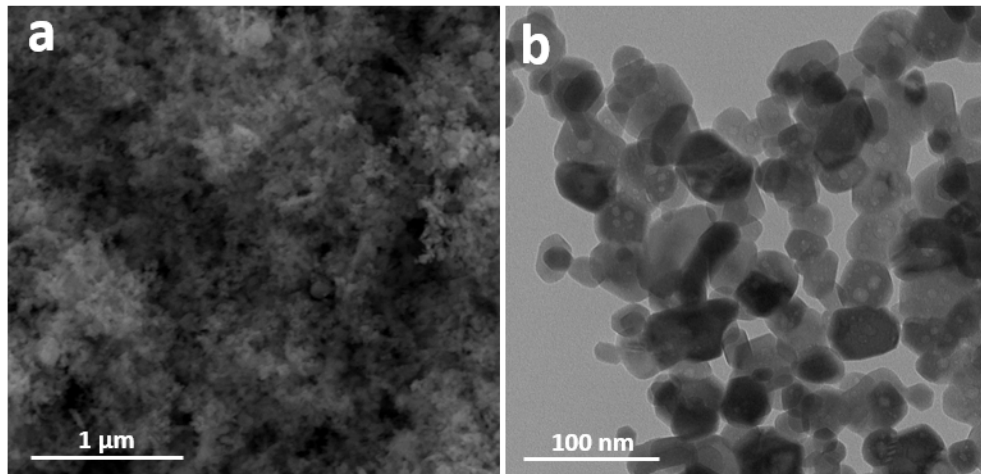

Fig. S4 (a) SEM and (b) TEM images of  $\text{Co}_3\text{O}_4$  prepared via calcination of hydrolyzed product using Co-NTCDA microspindles as precursor in TPAOH system at 500 °C.

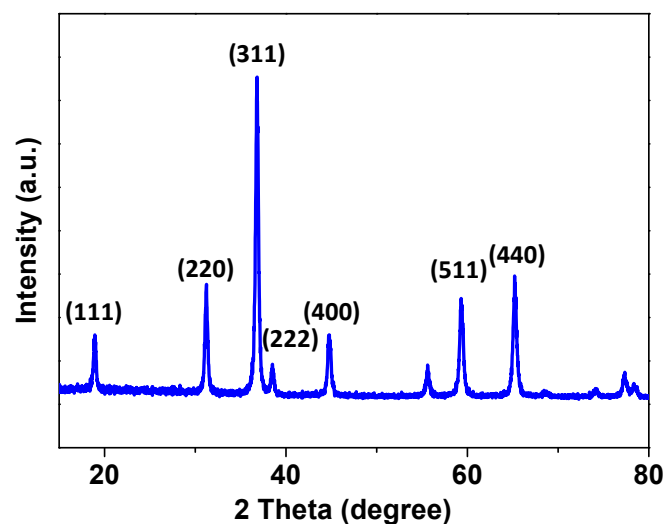

Fig. S5 XRD patterns of  $\text{Co}_3\text{O}_4$  prepared via calcination of hydrolyzed product using Co-NTCDA microspindles as precursor in TPAOH system at 500 °C.

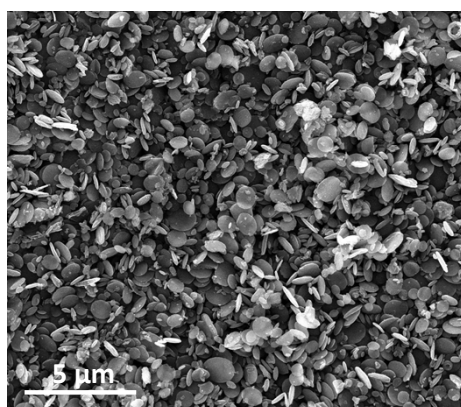

Fig. S6 SEM images of Co-PTCDA microellipsoids.

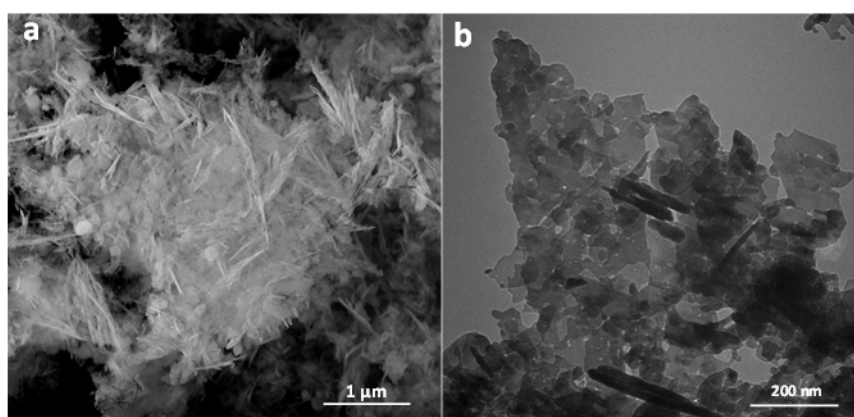

Fig. S7 (a) SEM and (b) TEM images of  $\text{Co}_3\text{O}_4$  prepared via calcination of hydrolyzed product using Co-PTCDA microellipsoids as precursor in TMAOH system at 500 °C.

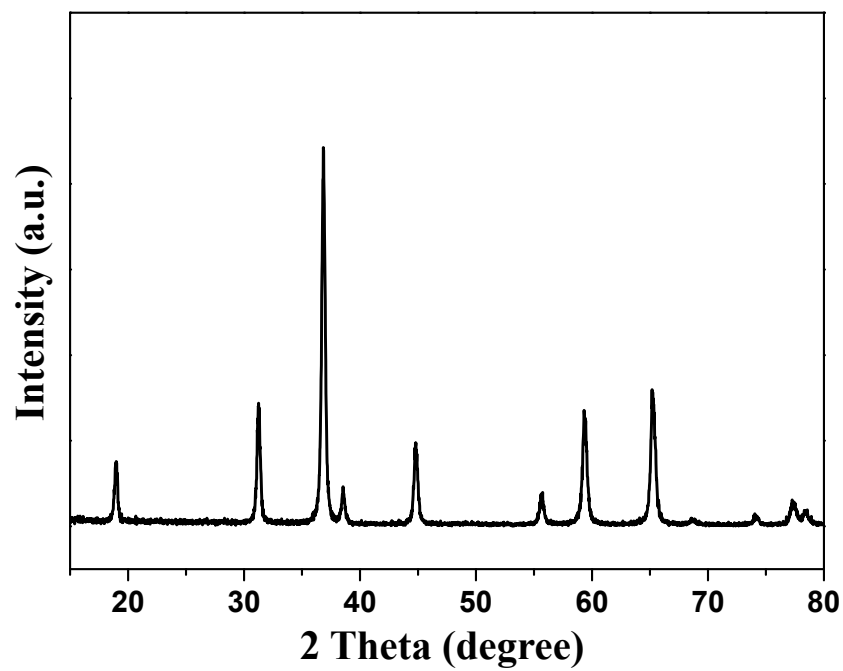

Fig. S8 XRD pattern of  $\text{Co}_3\text{O}_4$  prepared via calcination of hydrolyzed product using Co-PTCDA microellipsoids as precursor in TMAOH system at 500 °C.

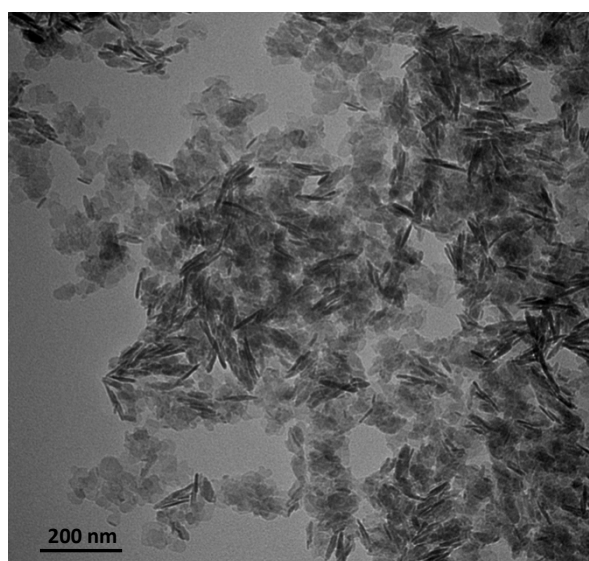

Fig. S9 TEM image of hydrolysis product obtained by mixing  $\text{Co}(\text{OAc})_2$ , NTCDA, TMAOH in water.
